# Supplementary material for: Adding biomarker change information to the kidney failure risk equation improves predictive ability for dialysis dependency in eGFR <30 ml/min/1.73 m2
Source: PubMed Central journal article supplement (PMC11574387; doi:10.1093/ckj/sfae321), 2024-10-24

**Table S1.** Distributions of variables in the training and validation cohorts

| Variable                                                                   | Category        | Training      | Validation    | p-value |
|----------------------------------------------------------------------------|-----------------|---------------|---------------|---------|
|                                                                            |                 | N=2,250       | N=2,249       |         |
| Sex (male)                                                                 |                 | 1,114 (49.5%) | 1,101 (49.0%) | 0.71    |
| Age (years)                                                                |                 | 77 (10)       | 77 (10)       | 0.66    |
| Body mass index (kg/m <sup>2</sup> )                                       |                 | 23.8 (3.9)    | 23.9 (3.8)    | 0.59    |
| Body mass index category (kg/m <sup>2</sup> )                              | <18.5           | 127 (5.6%)    | 133 (5.9%)    | 0.80    |
|                                                                            | 18.5–24.99      | 1,365 (60.7%) | 1,332 (59.2%) |         |
|                                                                            | 25.00–29.99     | 610 (27.1%)   | 627 (27.9%)   |         |
|                                                                            | ≥30.00          | 146 (6.5%)    | 154 (6.8%)    |         |
|                                                                            | Missing         | 2 (0.1%)      | 3 (0.1%)      |         |
| Systolic blood pressure at initial checkup (mmHg)                          |                 | 133 (18)      | 133 (18)      | 0.43    |
| Diastolic blood pressure at initial checkup (mmHg)                         |                 | 72 (12)       | 72 (12)       | 0.87    |
| Smoking status                                                             | Non/past smoker | 1,914 (85.1%) | 1,929 (85.8%) | 0.45    |
|                                                                            | Current smoker  | 182 (8.1%)    | 160 (7.1%)    |         |
|                                                                            | Missing         | 154 (6.8%)    | 160 (7.1%)    |         |
| Estimated glomerular filtration rate (mL/min/1.73m <sup>2</sup> )          |                 | 23.5 (5.6)    | 23.6 (5.6)    | 0.46    |
| Estimated glomerular filtration rate category (mL/min/1.73m <sup>2</sup> ) | 15–29           | 2,039 (90.6%) | 2,036 (90.5%) | 0.91    |
|                                                                            | <15             | 211 (9.4%)    | 213 (9.5%)    |         |
|                                                                            | Negative        | 922 (41.0%)   | 888 (39.5%)   |         |
| Trace                                                                      | 259 (11.5%)     | 295 (13.1%)   |               |         |
| Proteinuria by dipstick test                                               | +               | 409 (18.2%)   | 437 (19.4%)   |         |
|                                                                            | 2+              | 413 (18.4%)   | 390 (17.3%)   |         |
|                                                                            | 3+              | 247 (11.0%)   | 239 (10.6%)   |         |
| Predicted albumin-creatinine ratio (mg/gCr)                                |                 | 215.5 (376.0) | 210.9 (377.1) | 0.68    |
| HbA1c (%)                                                                  |                 | 5.9 (0.7)     | 5.9 (0.8)     | 0.65    |
| HbA1c category (%)                                                         | <5.7            | 1,140 (50.7%) | 1,170 (52.0%) | 0.24    |
|                                                                            | 5.7–6.4         | 753 (33.5%)   | 723 (32.1%)   |         |
|                                                                            | 6.5–7.9         | 289 (12.8%)   | 281 (12.5%)   |         |
|                                                                            | ≥8.0            | 34 (1.5%)     | 50 (2.2%)     |         |
|                                                                            | Missing         | 34 (1.5%)     | 25 (1.1%)     |         |
| Low-density lipoprotein cholesterol (mg/dL)                                |                 | 109.4 (31.6)  | 108.5 (31.1)  | 0.36    |

|                                                                                         |                                               |               |               |      |
|-----------------------------------------------------------------------------------------|-----------------------------------------------|---------------|---------------|------|
| Comorbid diabetes                                                                       |                                               | 1,012 (45.0%) | 1,001 (44.5%) | 0.75 |
| Comorbid hypertension                                                                   |                                               | 2,116 (94.0%) | 2,125 (94.5%) | 0.52 |
| History of cardiocerebrovascular disease                                                | Without cardiocerebrovascular disease history | 1,117 (49.6%) | 1,147 (51.0%) | 0.36 |
|                                                                                         | With cardiocerebrovascular disease history    | 1,133 (50.4%) | 1,102 (49.0%) |      |
| Yearly change in estimated glomerular filtration rate (mL/min/1.73m <sup>2</sup> /year) |                                               | 1.5 (11.4)    | 1.5 (11.4)    | 0.88 |
| No or worse change in proteinuria level                                                 |                                               | 646 (28.7%)   | 626 (27.8%)   | 0.51 |
| Days of follow-up                                                                       |                                               | 757.2 (485.4) | 759.8 (489.1) | 0.86 |
| Dialysis dependency developed                                                           |                                               | 216 (9.6%)    | 206 (9.2%)    | 0.61 |

---

Data are presented as the means (standard deviations) for continuous measures and N (%) for categorical measures.

\*Body mass index, HbA1c, and low-density lipoprotein cholesterol were summarized after excluding 5, 59, and 10 patients without the corresponding information, respectively.

**Table S2. Hazard ratios for kidney replacement therapy in the KFRE model and modified KFRE model**

| The KFRE model                       |          |              |                         |   |       |
|--------------------------------------|----------|--------------|-------------------------|---|-------|
| Variable                             | Category | Hazard ratio | 95% confidence interval |   |       |
| Age increase (10 years)              |          | 0.76         | 0.67                    | – | 0.86  |
| Male                                 |          | 1.53         | 1.15                    | – | 2.03  |
| eGFR                                 |          | 0.87         | 0.85                    | – | 0.89  |
| Urinary protein                      | Negative | Reference    |                         |   |       |
|                                      | Trace    | 3.44         | 1.67                    | – | 7.07  |
|                                      | 1+       | 7.80         | 4.28                    | – | 14.22 |
|                                      | 2+       | 16.80        | 9.57                    | – | 29.48 |
|                                      | 3+       | 23.66        | 13.25                   | – | 42.26 |
| The modified KFRE model              |          |              |                         |   |       |
| Variable                             | Category | Hazard ratio | 95% confidence interval |   |       |
| Age increase (10 years)              |          | 0.79         | 0.69                    | – | 0.90  |
| Male                                 |          | 1.72         | 1.28                    | – | 2.30  |
| eGFR                                 |          | 0.78         | 0.76                    | – | 0.81  |
| Urinary protein                      | Negative | Reference    |                         |   |       |
|                                      | Trace    | 1.30         | 0.62                    | – | 2.73  |
|                                      | 1+       | 2.52         | 1.40                    | – | 4.55  |
|                                      | 2+       | 5.70         | 3.25                    | – | 9.99  |
|                                      | 3+       | 9.64         | 5.22                    | – | 17.81 |
| No improvement in urinary protein    |          | 2.86         | 2.02                    | – | 4.04  |
| Change in eGFR slope (per minus one) |          | 1.30         | 1.26                    | – | 1.35  |

KFRE, Kidney Failure Risk Equation; eGFR, estimated glomerular filtration rate

**Table S3. Hazard ratios for kidney replacement therapy in the KFRE model and modified KFRE model**

---

Two-year recalibrated KFRE model

---

$1 - 0.9287 \times \exp(-0.2735 \times (\text{age}/10 - 7.723) + 0.4260 \times (\text{male} - 0.4923) - 0.1379 \times (\text{eGFR} - 23.5785) + 1.2353 \text{ if trace proteinuria} + 2.0544 \text{ if proteinuria of "+"} + 2.8212 \text{ if proteinuria of "2+"} + 3.1637 \text{ if proteinuria of "3+"})$

Two-year recalibrated modified KFRE model

$1 - 0.9956 \times \exp(-0.2357 \times (\text{age}/10 - 7.723) + 0.5414 \times (\text{male} - 0.4923) - 0.2445 \times (\text{eGFR} - 23.5785) + 0.2655 \text{ if trace proteinuria} + 0.9255 \text{ if proteinuria of "+"} + 1.740 \text{ if proteinuria of "2+"} + 2.2656 \text{ if proteinuria of "3+"} + 0.2660 \times \text{eGFR yearly slope} + 0.2655 \text{ if no improvement in proteinuria})$

Original 2-year modified KFRE model (JAMA. 2016;315(2):164-74)

$1 - 0.9750 \times \exp(-0.2201 \times (\text{age}/10 - 7.036) + 0.2467 \times (\text{male} - 0.5642) - 0.5567 \times (\text{eGFR}/5 - 7.222) + 0.4510 \times (\log\text{ACR} - 5.137))$

Abbreviations: KFRE, Kidney Failure Risk Equation; eGFR, estimated glomerular filtration rate; ACR, albumin-creatinine ratio

**Table S4. Model diagnostics for the prediction of kidney failure in analyses stratified age and sex.**

| Type of stratum     | Item                  | Point estimate | 95% interval | confidence |       | P value |
|---------------------|-----------------------|----------------|--------------|------------|-------|---------|
| Age < 75 years      | NRI                   |                |              |            |       |         |
| N=1,512             | NRI for events        | 0.507          | 0.354        | –          | 0.660 | <0.001  |
|                     | NRI for non-events    | 0.194          | 0.116        | –          | 0.273 | <0.001  |
|                     | Total NRI             | 0.701          | 0.530        | –          | 0.873 | <0.001  |
|                     | C-statistics          |                |              |            |       |         |
|                     | KFRE model            | 0.811          | 0.773        | –          | 0.848 |         |
|                     | Modified KFRE model   | 0.910          | 0.891        | –          | 0.929 |         |
|                     | $\Delta$ C-statistics | 0.099          | 0.070        | –          | 0.129 | <0.001  |
| Age $\geq$ 75 years | NRI                   |                |              |            |       |         |
| N=2,987             | NRI for events        | 0.618          | 0.384        | –          | 0.852 | <0.001  |
|                     | NRI for non-events    | 0.244          | 0.192        | –          | 0.296 | <0.001  |
|                     | Total NRI             | 0.862          | 0.622        | –          | 1.102 | <0.001  |
|                     | C-statistics          |                |              |            |       |         |
|                     | KFRE model            | 0.871          | 0.828        | –          | 0.914 |         |
|                     | Modified KFRE model   | 0.915          | 0.885        | –          | 0.945 |         |
|                     | $\Delta$ C-statistics | 0.045          | 0.023        | –          | 0.067 | <0.001  |
| Female              | NRI                   |                |              |            |       |         |
| N=2,284             | NRI for events        | 0.508          | 0.272        | –          | 0.743 | <0.001  |
|                     | NRI for non-events    | 0.272          | 0.213        | –          | 0.332 | <0.001  |
|                     | Total NRI             | 0.780          | 0.537        | –          | 1.023 | <0.001  |
|                     | C-statistics          |                |              |            |       |         |
|                     | KFRE model            | 0.840          | 0.793        | –          | 0.886 |         |
|                     | Modified KFRE model   | 0.910          | 0.877        | –          | 0.943 |         |
|                     | $\Delta$ C-statistics | 0.070          | 0.039        | –          | 0.102 | <0.001  |
| Male                | NRI                   |                |              |            |       |         |
| N=2,215             | NRI for events        | 0.560          | 0.407        | –          | 0.713 | <0.001  |
|                     | NRI for non-events    | 0.180          | 0.117        | –          | 0.243 | <0.001  |
|                     | Total NRI             | 0.741          | 0.575        | –          | 0.906 | <0.001  |
|                     | C-statistics          |                |              |            |       |         |
|                     | KFRE model            | 0.848          | 0.815        | –          | 0.882 |         |

|                       |       |       |   |       |        |
|-----------------------|-------|-------|---|-------|--------|
| Modified KFRE model   | 0.913 | 0.891 | – | 0.934 |        |
| $\Delta$ C-statistics | 0.065 | 0.043 | – | 0.086 | <0.001 |

---

KFRE, Kidney Failure Risk Equation; NRI, net reclassification index

**Table S5. Model diagnostics for the prediction of dialysis dependency in sensitivity analyses.**

| Type of sensitivity analysis                                                       | Item                  | Point estimate | 95% interval | confidence | P value |
|------------------------------------------------------------------------------------|-----------------------|----------------|--------------|------------|---------|
| Sensitivity analysis 1<br>(Using the 6-variable KFRE model)                        | NRI                   |                |              |            |         |
|                                                                                    | NRI for events        | 0.544          | 0.415        | – 0.672    | <0.001  |
|                                                                                    | NRI for non-events    | 0.229          | 0.186        | – 0.272    | <0.001  |
|                                                                                    | Total NRI             | 0.773          | 0.637        | – 0.908    | <0.001  |
|                                                                                    | C-statistics          |                |              |            |         |
|                                                                                    | KFRE model            | 0.866          | 0.841        | – 0.891    |         |
|                                                                                    | Modified KFRE model   | 0.922          | 0.906        | – 0.939    |         |
| Sensitivity analysis 2<br>(Using predicted albuminuria levels)                     | NRI                   |                |              |            |         |
|                                                                                    | NRI for events        | 0.544          | 0.415        | – 0.672    | <0.001  |
|                                                                                    | NRI for non-events    | 0.229          | 0.186        | – 0.272    | <0.001  |
|                                                                                    | Total NRI             | 0.773          | 0.637        | – 0.908    | <0.001  |
|                                                                                    | C-statistics          |                |              |            |         |
|                                                                                    | KFRE model            | 0.869          | 0.844        | – 0.893    |         |
|                                                                                    | Modified KFRE model   | 0.922          | 0.905        | – 0.938    |         |
| Sensitivity analysis 3<br>(Individuals with eGFR < 45 ml/min/1.73 m <sup>2</sup> ) | NRI                   |                |              |            |         |
|                                                                                    | NRI for events        | 0.646          | 0.541        | – 0.750    | <0.001  |
|                                                                                    | NRI for non-events    | 0.238          | 0.224        | – 0.253    | <0.001  |
|                                                                                    | Total NRI             | 0.884          | 0.779        | – 0.990    | <0.001  |
|                                                                                    | C-statistics          |                |              |            |         |
|                                                                                    | KFRE model            | 0.934          | 0.917        | – 0.950    |         |
|                                                                                    | Modified KFRE model   | 0.952          | 0.939        | – 0.966    |         |
|                                                                                    | $\Delta$ C-statistics | 0.019          | 0.011        | – 0.026    | <0.001  |

KFRE, Kidney Failure Risk Equation; NRI, net reclassification index; eGFR, estimated glomerular filtration rate

Figure S1. Overview of study design and model preparation.

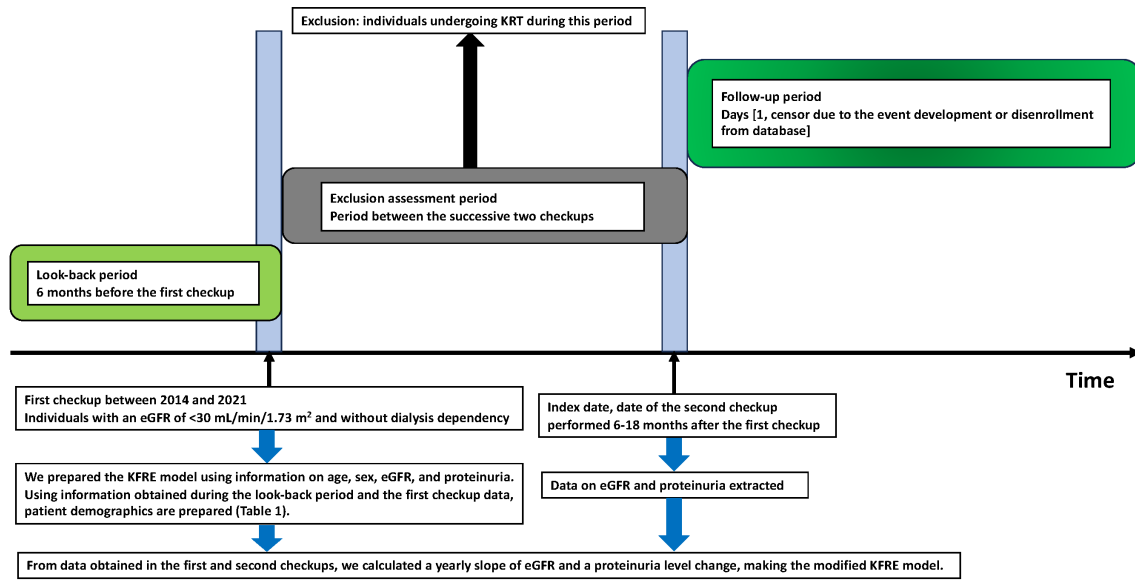

Abbreviations: KRT, kidney replacement therapy; eGFR, estimated glomerular filtration rate.



Figure S2. Receiver operating characteristic curve in the prediction of dialysis dependency development with use of yearly slopes of estimated glomerular filtration rate.

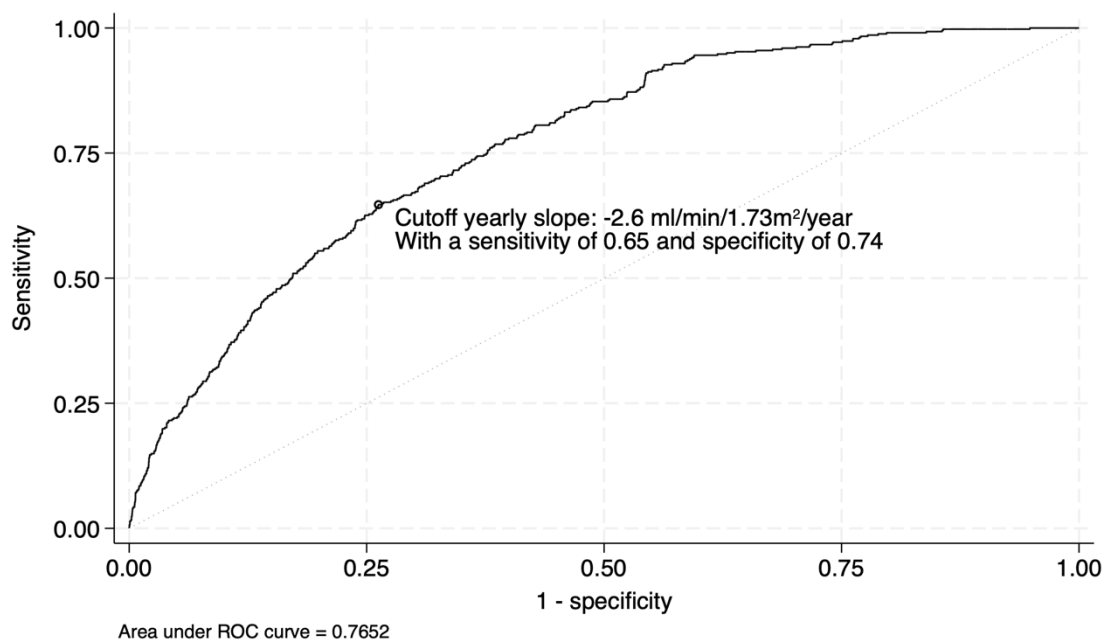

**Figure S3. Decision curve for the dialysis-dependency prediction using the KFRE and modified KFRE models, with different threshold probabilities in the age-stratified analysis.**

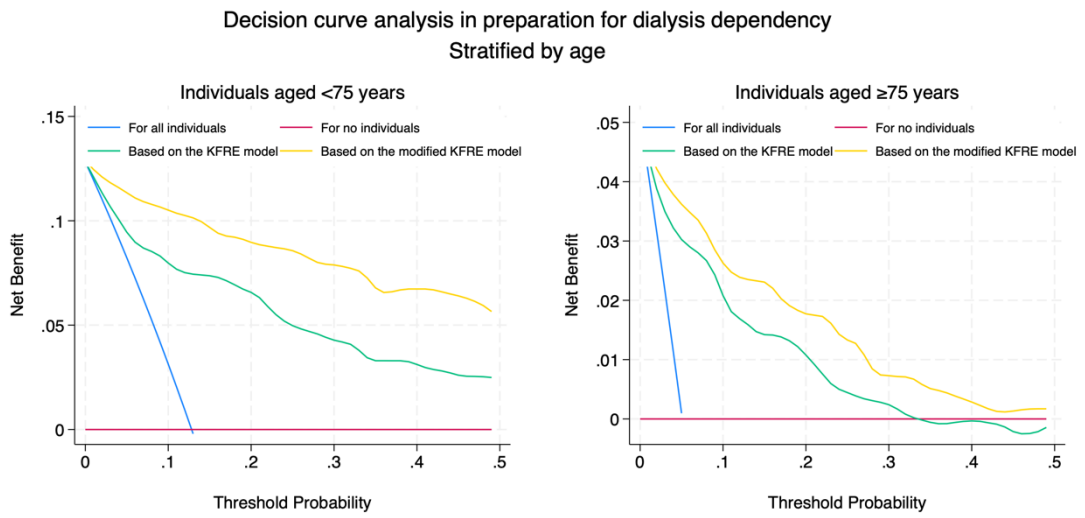

**Figure S4. Decision curve for the dialysis-dependency prediction using the KFRE and modified KFRE models, with different threshold probabilities in the sex-stratified analysis.**

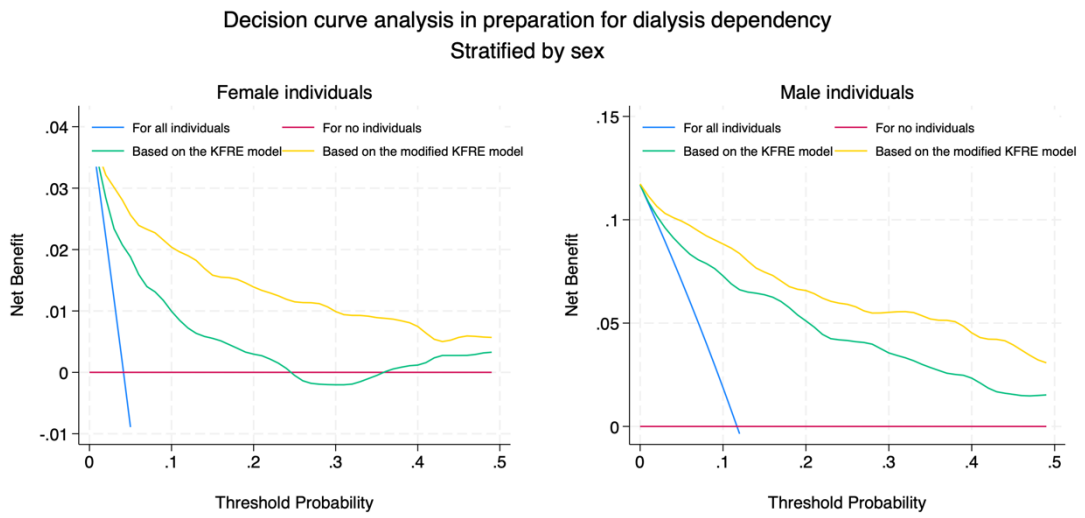

Figure S5 Decision curve for the dialysis-dependency prediction using the KFRE and modified KFRE models, with different threshold probabilities in Sensitivity analysis 1 (using the 6-variable instead of 4-variable KFRE model as the reference).

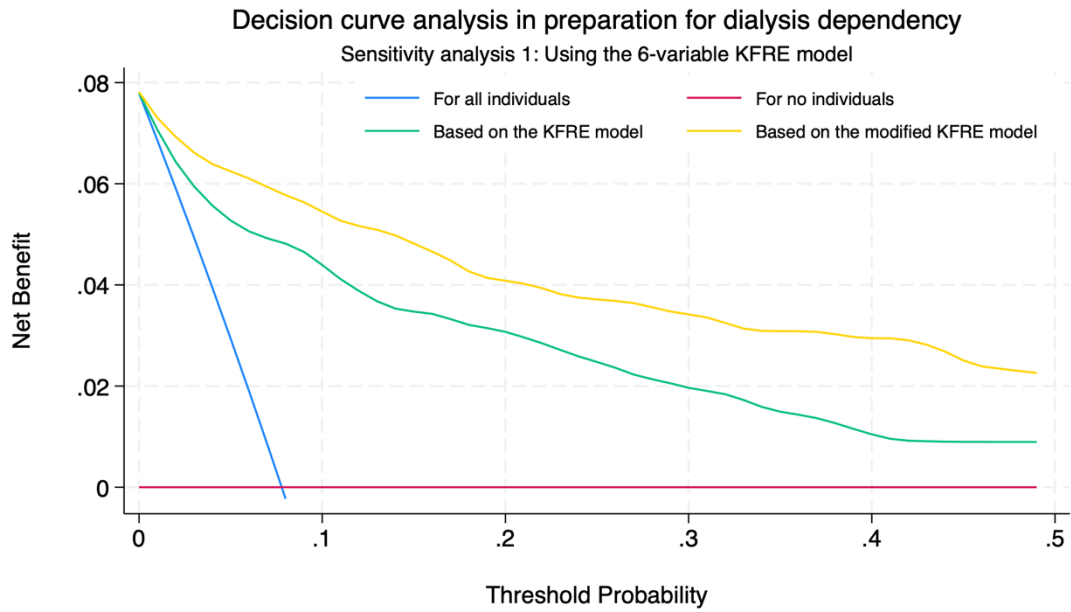

Figure S6. Decision curve for the dialysis-dependency prediction using the KFRE and modified KFRE models, with different threshold probabilities in Sensitivity analysis 2 (using the predicted albuminuria levels).

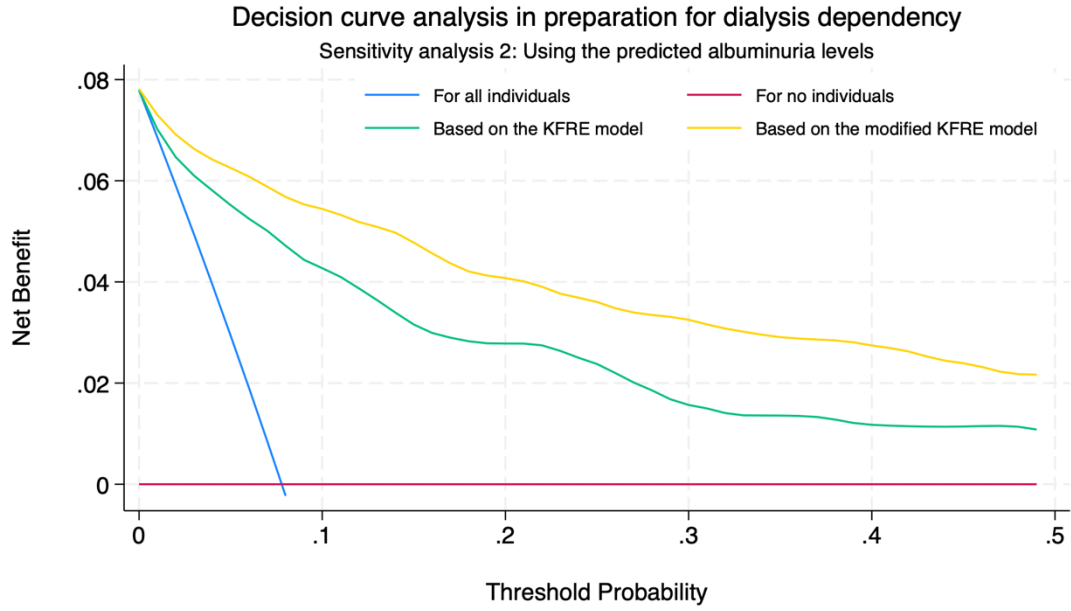

**Figure S7.** Decision curve for the dialysis-dependency prediction using the KFRE and modified KFRE models, with different threshold probabilities in Sensitivity analysis 3 (individuals with estimated glomerular filtration rate < 45 mL/min/1.73 m<sup>2</sup> instead of < 30 mL/min/1.73 m<sup>2</sup>).

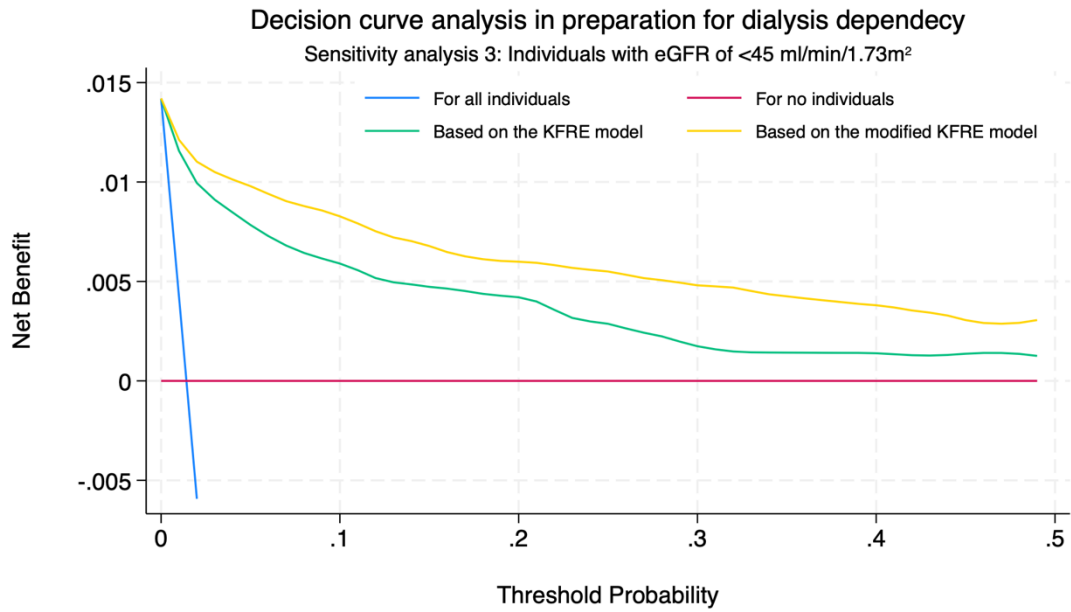

Supplement: sfae321_supplemental_file.pdf [file sfae321_supplemental_file.pdf]
